# Supplementary material for: Isolation, Molecular Identification and Mycotoxin Profile of Fusarium Species Isolated from Maize Kernels in Iran
Source: PubMed Central journal article supplement (PMC6563283; doi:10.3390/toxins11050297), 2019-05-24
Supplement: toxins-11-00297-s001.pdf [file toxins-11-00297-s001.pdf]

## Supplementary Materials: Isolation, Molecular Identification and Mycotoxin Profile of Fusarium Species Isolated from Maize Kernels in Iran

Maryam Fallahi, Hossein Saremi, Mohammad Javan-Nikkhah, Stefania Somma, Miriam Haidukowski, Antonio Francesco Logrieco and Antonio Moretti

**Table S1.** Fumonisin B<sub>1</sub> (FB<sub>1</sub>), B<sub>2</sub> (FB<sub>2</sub>) and B<sub>3</sub> (FB<sub>3</sub>) production by *F. verticillioides* and *F. proliferatum* strains from Iranian maize kernels.

| Species                   | Iranian Province | Strain ITEM code | FB <sub>1</sub> (µg/g) | FB <sub>2</sub> (µg/g) | FB <sub>3</sub> (µg/g) | Total FBs (µg/g) |
|---------------------------|------------------|------------------|------------------------|------------------------|------------------------|------------------|
| <i>F. verticillioides</i> | Qazvin           | 18034            | 461                    | n.d.                   | n.d.                   | 461              |
|                           | Qazvin           | 18037            | 783                    | n.d.                   | n.d.                   | 783              |
|                           | Qazvin           | 18039            | 509                    | n.d.                   | n.d.                   | 509              |
|                           | Qazvin           | 18041            | 544                    | n.d.                   | n.d.                   | 544              |
|                           | Qazvin           | 18043            | 819                    | n.d.                   | n.d.                   | 819              |
|                           | Qazvin           | 18045            | 1103                   | n.d.                   | n.d.                   | 1103             |
|                           | Qazvin           | 18049            | 526                    | n.d.                   | n.d.                   | 526              |
|                           | Qazvin           | 18052            | 164                    | n.d.                   | n.d.                   | 164              |
|                           | Qazvin           | 18054            | 568                    | n.d.                   | n.d.                   | 568              |
|                           | Qazvin           | 18056            | 415                    | n.d.                   | n.d.                   | 415              |
|                           | Qazvin           | 18057            | 611                    | n.d.                   | n.d.                   | 611              |
|                           | Qazvin           | 18059            | 526                    | n.d.                   | n.d.                   | 526              |
|                           | Qazvin           | 18061            | 83                     | n.d.                   | n.d.                   | 83               |
|                           | Qazvin           | 18063            | 526                    | n.d.                   | n.d.                   | 526              |
|                           | Qazvin           | 18065            | 221                    | n.d.                   | n.d.                   | 221              |
|                           | Khuzestan        | 18066            | 307                    | n.d.                   | n.d.                   | 307              |
|                           | Khuzestan        | 18069            | 291                    | n.d.                   | n.d.                   | 291              |
|                           | Khuzestan        | 18072            | 507                    | n.d.                   | n.d.                   | 507              |
|                           | Khuzestan        | 18074            | 236                    | n.d.                   | n.d.                   | 236              |
|                           | Khuzestan        | 18076            | 568                    | n.d.                   | n.d.                   | 568              |
|                           | Khuzestan        | 18078            | 444                    | n.d.                   | n.d.                   | 444              |
|                           | Khuzestan        | 18081            | 595                    | n.d.                   | n.d.                   | 595              |
|                           | Khuzestan        | 18083            | 553                    | n.d.                   | n.d.                   | 553              |
|                           | Khuzestan        | 18087            | 2232                   | n.d.                   | n.d.                   | 2232             |
|                           | Khuzestan        | 18089            | 580                    | n.d.                   | n.d.                   | 580              |
|                           | Khuzestan        | 18092            | 280                    | n.d.                   | n.d.                   | 280              |
|                           | Khuzestan        | 18094            | 596                    | n.d.                   | n.d.                   | 596              |
|                           | Khuzestan        | 18096            | 273                    | n.d.                   | n.d.                   | 273              |
|                           | Fars             | 18099            | 617                    | n.d.                   | n.d.                   | 617              |
|                           | Fars             | 18101            | 572                    | n.d.                   | n.d.                   | 572              |
|                           | Fars             | 18104            | 216                    | n.d.                   | n.d.                   | 216              |
|                           | Fars             | 18108            | 704                    | n.d.                   | n.d.                   | 704              |
|                           | Fars             | 18110            | 1446                   | n.d.                   | n.d.                   | 1446             |
|                           | Fars             | 18112            | 411                    | n.d.                   | n.d.                   | 411              |
|                           | Fars             | 18114            | 444                    | n.d.                   | n.d.                   | 444              |

|                        |          |       |      |       |      |      |
|------------------------|----------|-------|------|-------|------|------|
| Fars                   | 18116    | 423   | n.d. | n.d.  | 423  |      |
| Fars                   | 18118    | 472   | n.d. | n.d.  | 472  |      |
| Fars                   | 18120    | 786   | n.d. | n.d.  | 786  |      |
| Fars                   | 18122    | 1027  | n.d. | n.d.  | 1027 |      |
| Fars                   | 18124    | 694   | n.d. | n.d.  | 694  |      |
| Fars                   | 18127    | 399   | n.d. | n.d.  | 399  |      |
| Fars                   | 18129    | 449   | n.d. | n.d.  | 449  |      |
| Fars                   | 18131    | 505   | n.d. | n.d.  | 505  |      |
| Ardabil                | 18133    | 386   | n.d. | n.d.  | 386  |      |
| Ardabil                | 18135    | 255   | n.d. | n.d.  | 255  |      |
| Ardabil                | 18137    | 374   | n.d. | n.d.  | 374  |      |
| Ardabil                | 18139    | 430   | n.d. | n.d.  | 430  |      |
| Ardabil                | 18141    | 147   | n.d. | n.d.  | 147  |      |
| Ardabil                | 18143    | 488   | n.d. | n.d.  | 488  |      |
| Ardabil                | 18145    | 514   | n.d. | n.d.  | 514  |      |
| Ardabil                | 18147    | 442   | n.d. | n.d.  | 442  |      |
| Ardabil                | 18149    | 453   | n.d. | n.d.  | 453  |      |
| Ardabil                | 18151    | 415   | n.d. | n.d.  | 415  |      |
| Ardabil                | 18153    | 475   | n.d. | n.d.  | 475  |      |
| Ardabil                | 18155    | 359   | n.d. | n.d.  | 359  |      |
| Ardabil                | 18157    | 552   | n.d. | n.d.  | 552  |      |
| Ardabil                | 18159    | 428   | n.d. | n.d.  | 428  |      |
| Ardabil                | 18161    | 479   | n.d. | n.d.  | 479  |      |
| Khuzestan              | 18172    | 379   | n.d. | n.d.  | 379  |      |
| Khuzestan              | 18174    | 387   | n.d. | n.d.  | 387  |      |
| Golestan               | 18233    | 537   | n.d. | n.d.  | 537  |      |
| Golestan               | 18235    | 304   | n.d. | n.d.  | 304  |      |
| Golestan               | 18238    | 246   | n.d. | n.d.  | 246  |      |
| Golestan               | 18240    | 451   | n.d. | n.d.  | 451  |      |
| Golestan               | 18241    | 329   | n.d. | n.d.  | 329  |      |
| Golestan               | 18242    | 79    | n.d. | n.d.  | 79   |      |
| Golestan               | 18243    | 416   | n.d. | n.d.  | 416  |      |
| <i>F. proliferatum</i> | Qazvin   | 18036 | 78   | 5.0   | 6.6  | 90   |
|                        | Qazvin   | 18040 | 15   | n.d.  | n.d. | 15   |
|                        | Qazvin   | 18051 | 187  | 0.4   | 0.5  | 187  |
|                        | Qazvin   | 18163 | 45   | 3.4   | 1.2  | 49   |
|                        | Qazvin   | 18177 | 1860 | 465.7 | 9.7  | 2335 |
|                        | Qazvin   | 18182 | 110  | 1.7   | n.d. | 112  |
|                        | Qazvin   | 18187 | 131  | 1.7   | n.d. | 133  |
|                        | Qazvin   | 18189 | 1    | n.d.  | n.d. | 1    |
|                        | Fars     | 18097 | 201  | n.d.  | n.d. | 201  |
|                        | Fars     | 18098 | 273  | 0.5   | 0.4  | 274  |
|                        | Fars     | 18214 | 86   | n.d.  | n.d. | 86   |
|                        | Ardabil  | 18222 | 169  | 2.9   | 1.1  | 173  |
|                        | Golestan | 18225 | 351  | n.d.  | n.d. | 351  |
|                        | Golestan | 18226 | 274  | n.d.  | n.d. | 274  |
|                        | Golestan | 18227 | 218  | 24.8  | 10.6 | 253  |
|                        | Golestan | 18228 | 97   | 0.6   | n.d. | 98   |
|                        | Golestan | 18231 | 187  | 1.3   | 0.5  | 188  |

|          |       |     |      |      |     |
|----------|-------|-----|------|------|-----|
| Golestan | 18234 | 54  | 0.3  | n.d. | 55  |
| Alborz   | 18244 | 195 | 3.0  | 2.3  | 201 |
| Alborz   | 18245 | 97  | 1.3  | 0.7  | 99  |
| Alborz   | 18247 | 5   | 1.4  | 1.4  | 8   |
| Alborz   | 18248 | 142 | n.d. | n.d. | 142 |
| Alborz   | 18255 | 92  | n.d. | n.d. | 92  |
| Alborz   | 18259 | 486 | n.d. | n.d. | 486 |
| Alborz   | 18260 | 205 | 2.6  | n.d. | 208 |
| Esfahan  | 18267 | 66  | 0.3  | n.d. | 67  |

---

n.d.: not detected.
